# Supplementary material
Source: PubMed Central journal article supplement (PMC7587116)
Supplement: JCM.01533-20-s0004.pdf [file JCM.01533-20-s0004.pdf]

Supplemental Figure 4

A

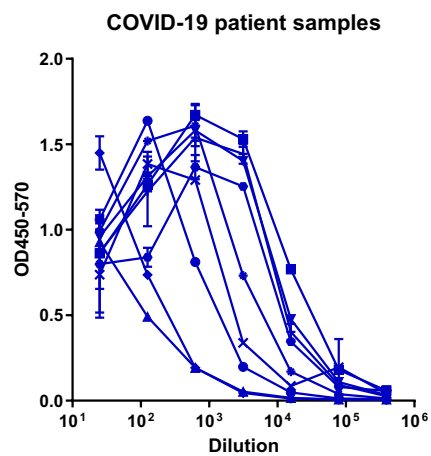

B

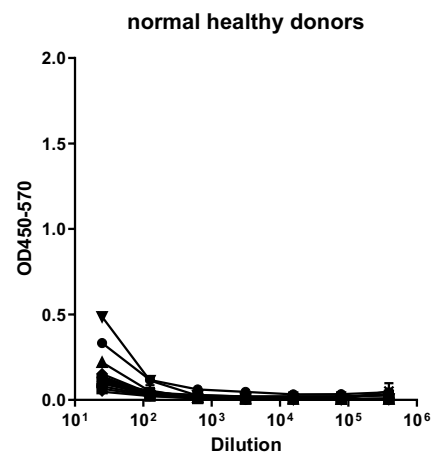

C

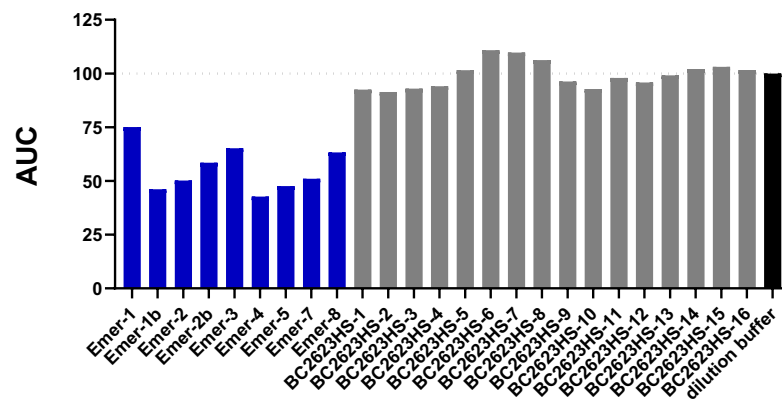

D

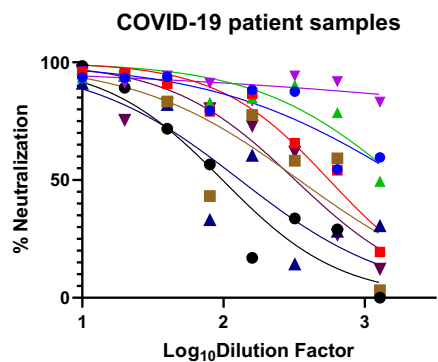

- Emer-1
- Emer-1b
- ▲ Emer-2
- ▼ Emer-2b
- Emer-3
- Emer-4
- ▲ Emer-5
- ▼ Emer-7

E

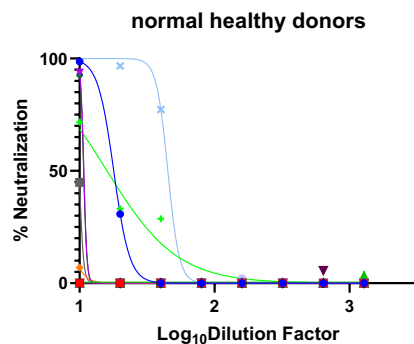

- BC2623HS-1
- BC2623HS-2
- ▲ BC2623HS-3
- ▼ BC2623HS-4
- BC2623HS-5
- BC2623HS-6
- ▲ BC2623HS-7
- ▼ BC2623HS-8
- BC2623HS-9
- BC2623HS-10
- ▲ BC2623HS-11
- ▼ BC2623HS-12
- BC2623HS-13
- BC2623HS-14
- ▲ BC2623HS-15
- ▼ BC2623HS-16
