# Supplementary material
Source: PubMed Central journal article supplement (PMC7587116)

Supplemental Figure 1

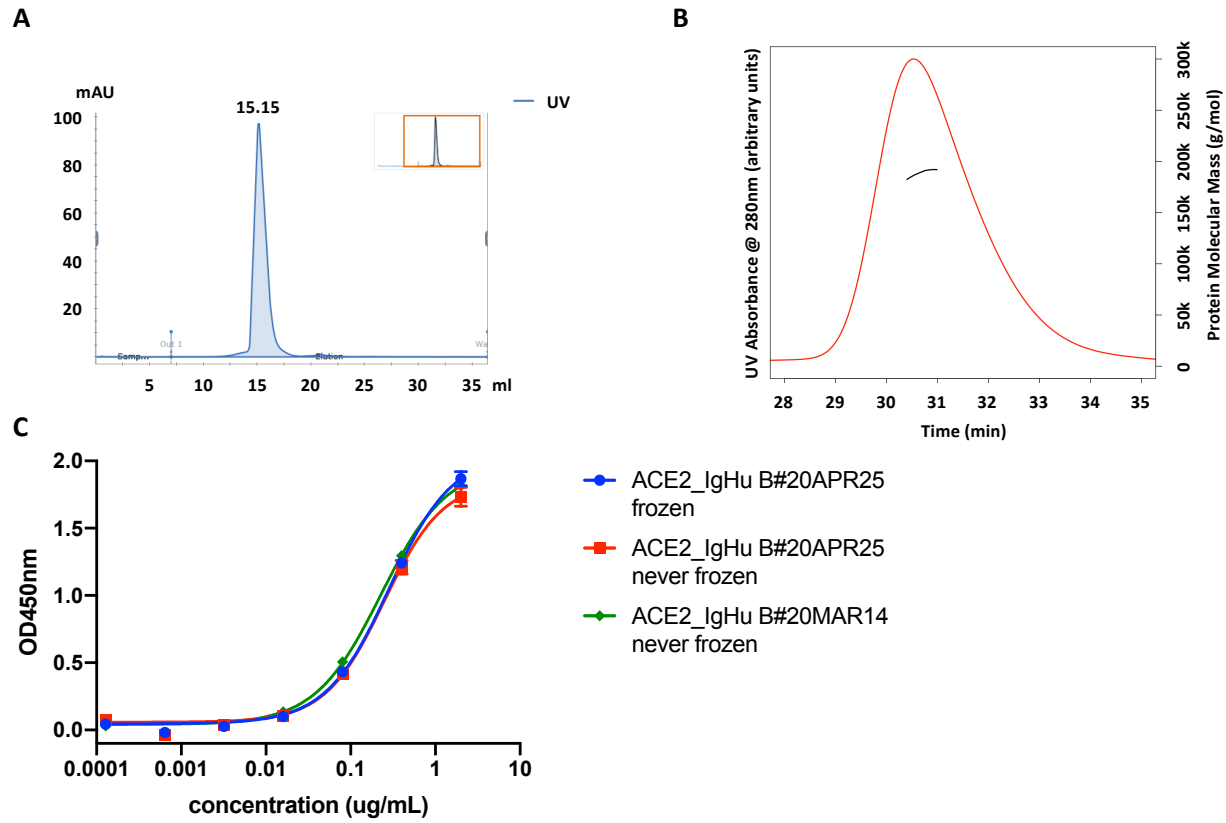

Supplement: JCM.01533-20-s0001.pdf [file JCM.01533-20-s0001.pdf]

## Supplemental Figure 2

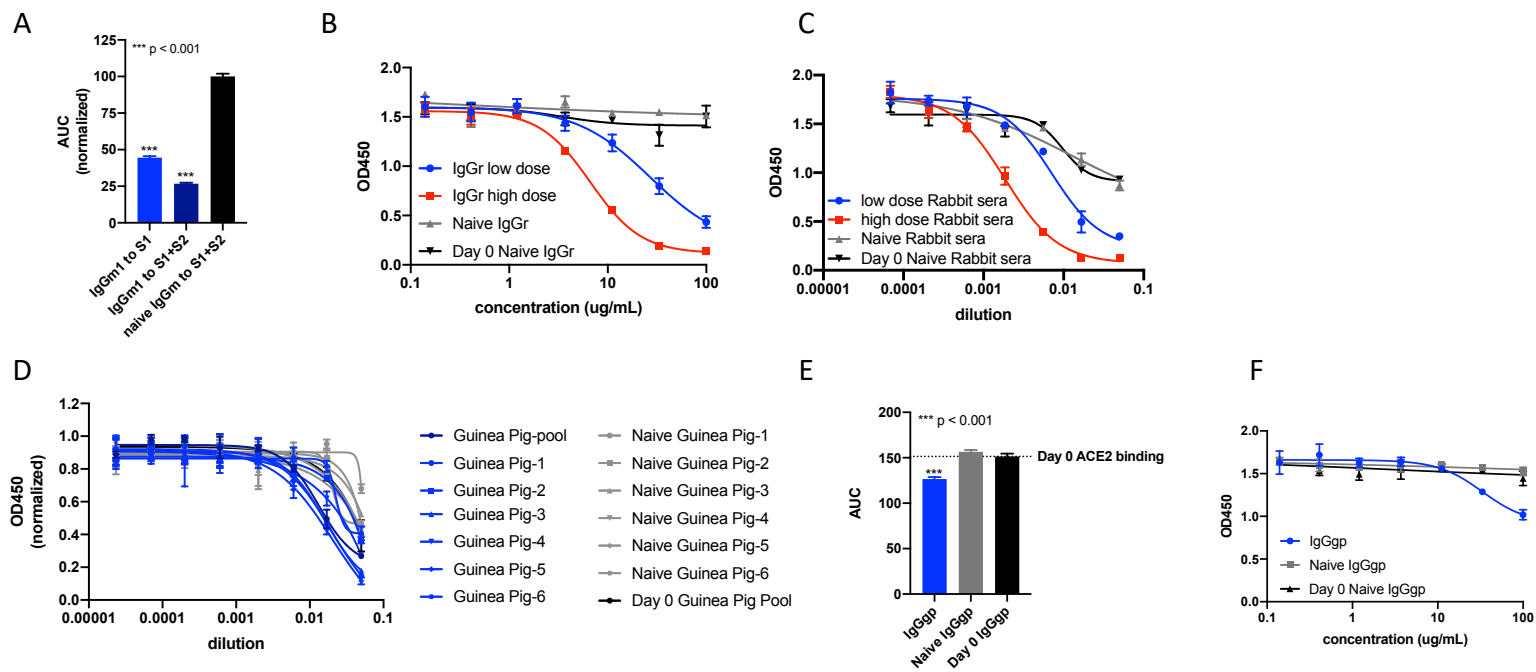

Supplement: JCM.01533-20-s0002.pdf [file JCM.01533-20-s0002.pdf]

Supplemental Figure 3

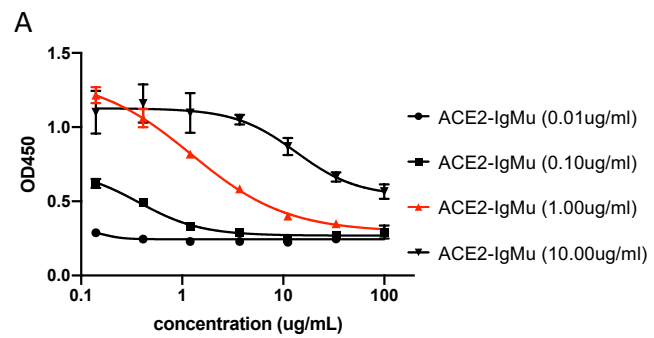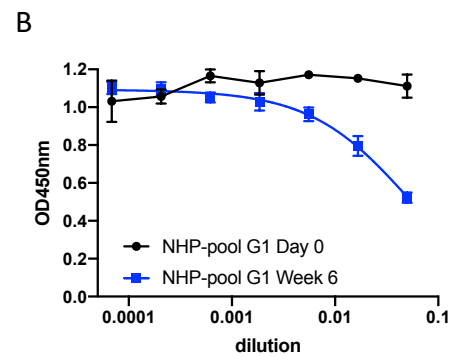

Supplement: JCM.01533-20-s0003.pdf [file JCM.01533-20-s0003.pdf]
